## Exponential damping key to successful containment of COVID-19 outbreak

Feng Zhang<sup>1\*</sup>, Jinmei Zhang<sup>2</sup>, Menglan Cao<sup>1</sup>, Yong Zhang<sup>1</sup>, Cang Hui<sup>3,4</sup>

1. Anhui Province Key Laboratory of Wetland Ecosystem Protection and Restoration, School of Resources and Environmental Engineering, Anhui University, Hefei 230601, China; 2. Xiguan Community Health Center of Liangzhou, Wuwei 733000, China. 3. Centre for Invasion Biology, Department of Mathematical Sciences, Stellenbosch University, Matieland 7602, South Africa; 4. Mathematical BioSciences Unit, African Institute for Mathematical Sciences, Cape Town 7945, South Africa.

\* Corresponding author.

Email: [fzhang188@163.com](mailto:fzhang188@163.com)

Short title: Exponential damping of COVID-19 spread

## **Abstract**

Due to the excessively high capability of human-to-human transmission, the 2019 novel coronavirus disease (COVID-19), first reported in Wuhan of China, has rapidly spread to the entire nation and beyond, and has now been declared a global public health emergency. Understanding the transmission pattern of the virus and the effect of control measures on the transmission, is crucial to improving the national and international disease control effectiveness. We here propose a simple model based on the exponential infectious growth but with a time-varying, largely damping, transmission rate. This model provides an excellent fit to the existing data and, we think, has largely captured the transmission pattern of the COVID-19 outbreak under a variety of intervention and control measures. Successful control measures, such as in China and South Korea, have resulted in an exponentially damping dynamics of the viral spread. Such exponential damping, therefore, could be used as a measure of control effectiveness, as also shown in the data of the 2003 severe acute respiratory syndrome (SARS). Our model suggests that the COVID-19 outbreak is currently accelerating worldwide with the exponential damping yet to emerge. Consistent with the message from the World Health Organisation (WHO), we thus strongly suggest all countries to take active measures to contain this global pandemic.

**Keywords:** epidemiology; transmission rate; COVID-19; SARS-CoV-2; ecological model.

## Introduction

The 2019 novel coronavirus (COVID-19) that can cause acute pneumonia was first reported in Wuhan in December 2019, the capital of Hubei Province in central China (1, 2). Due to the excessively high rate of human-to-human transmission, the virus has quickly spread across all 31 provinces of China and most countries of the world (3). In order to contain this outbreak, the Chinese authorities have taken a series of strict public health measures. Wuhan and all major cities in Hubei were sealed off, with human movement and traffic prohibited, quarantine imposed on all exposed people, makeshift hospitals quickly built to receive and cure infected patients. These measures have effectively contained the spread of this highly infectious novel coronavirus, after their implementation for just one month (4), and are considered highly efficient by the World Health Organization (WHO)(5). As the first wave of the pandemic has passed China, the COVID-19 now begins to rage worldwide, sweeping across all continents except Antarctica (6). For effectively monitoring and containing the pandemic, it is crucial to understand its rapidly changing and localised transmission patterns and evaluate whether implemented control measures are adequate to bend the epidemic curve.

Traditional epidemiological models, such as the SIR and SEIR models, explain the rapidly increasing number of infection cases by the large susceptible population, while the decline of infection by the depletion of the susceptible population (7). Such model structure is unsuitable for capturing the spread of COVID-19 due to the populations of massive size (easily running into tens or hundreds of million residents in a region), where the relatively limited infection has little detectable effects on the demography of the susceptible populations, unless a large fraction of the population can be infected. In addition, the parameterization of such models is also unreliable for a novel virus where its pathology and transmission pathways remain unclear with little data support. As such, we here propose a population ecology model with a time-varying infection rate to capture the transmission patterns of COVID-19. The advantage of this phenomenological model is that it does not rely on the detailed pathology, yet can still provide an accurate and rapid assessment of the COVID-19 transmission patterns. The rate of exponential

damping in transmission rate, as will be shown below, can provide a real-time evaluation on the efficiency of implemented control measures.

## Methods and Results

Assuming the population is large while the epidemic outbreak is limited so that its impact on the demographic dynamics of the susceptible population is negligible, we could capture the number of infected cases  $N(t)$  over time using an ordinary differential equation,  $dN(t)/dt = r(t)N(t)$ , where  $r(t)$  is the time-dependent transmission rate. Notably,  $dr(t)/dt > 0$  represents the acceleration of the epidemic spread, while  $dr(t)/dt < 0$  the deceleration and damping dynamics. The effective control measures should, arguably, result in the deceleration of the spread at high damping rate, while inadequate control measures could lead to a low damping rate and even the acceleration of the spread. The solution to the above differential equation is  $N(t) = N_0 e^{\int_{t_0}^t r(t) dt}$ , where  $N_0$  is the number of infected cases at the initial time ( $t_0$ ). Thus, to contain the virus outbreak with any measures, it is necessary to ensure the convergence of  $\lim_{t \rightarrow \infty} \int_{t_0}^t r(t) dt$ . The peak of the outbreak happens when the infection increases at the fastest pace ( $d^2N(t)/dt^2 = 0$ ) can be calculated by solving the equation  $dr(t)/dt + r(t)^2 = 0$ . In this simple model, the transmission pattern of an outbreak is solely captured by the transmission rate  $r(t)$  itself, which reflect the compound natural transmission rate under implemented control measures.

In practice, the transmission rate can be estimated as  $r(t + 1/2) = \ln(N(t + 1)) - \ln(N(t))$ , where  $t$  is measured in days. To illustrate our model, we first compiled the daily numbers of COVID-19 infections from 10 January to 3 March 2020 in Wuhan city, Hubei Province, and the whole of China from the website of the NHCC ([www.nhc.gov.cn](http://www.nhc.gov.cn)). Evidently, our model provided an excellent fit to the data, unveiling a clear pattern of COVID-19 transmission (Fig.1). The transmission rates in Wuhan, Hubei (excluding Wuhan), and the rest of China outside Hubei, all began to decline exponentially at around the same rate (about  $0.16 \text{ d}^{-1}$ ) after the large-scale control measures implemented by the Chinese authorities from 23 January (with a lag of a few days to see

the effect; red lines in the left panels of Fig.1). The exponential declines were more rapid outside Wuhan after 12 February (at a rate of  $0.32 \text{ d}^{-1}$ , see blue lines in the left panels of Fig.1). Such exponentially damping patterns has accurately captured the spreading dynamics of COVID-19 in China (see right panels of Fig.1), and thus provide a reliable monitoring signal to the effectiveness of the control measures implemented in other global regions for controlling the COVID-19 outbreak.

Using the daily infection numbers outside China from 20 January to 16 March 2020, from the WHO website ([www.who.int](http://www.who.int)), we analysed the dynamics of COVID-19 outbreak in three worst affected countries (South Korea, Iran and Italy) and the entire world outside China. We found that the transmission rates of COVID-19 in these three countries were all declining exponentially over time, with South Korea experienced the fastest rate of decline, similar to that of China (around  $0.16 \text{ d}^{-1}$ ), while the other two countries at a much slower rate of decline, especially in Italy (Fig.2). Using the current exponential function of transmission rate, we estimated the peak of COVID-19 spread is at 67.6 (95% CI: 67-75.3) days since 10 January 2020 in Iran, and 86.6 (95% CI: 73.5-121.4) days in Italy, while the peak in South Korea has passed at 50.6 days. According to our model, the final number of infected cases could reach up to 8895 (95% CI: 8593-9377) in South Korea, 42781 (95% CI: 28844-87335) in Iran, and 370841 (95% CI: 116538-617355) in Italy. For the entire world outside China, the spread of COVID-19 has been increasing exponentially at constant transmission rate with its damping pattern yet to emerge (the two bottom panels in Fig.2), which implies that the virus is spreading acceleratively in some countries and is currently out of control globally.

## **Discussion**

The data from China and South Korea show that it is possible to contain the spread of COVID-19, which was signalled by the exponentially damping of the transmission rate (Fig.1; the two top panels of Fig.2). Such exponential damping was evident from the data of the 2003 SARS outbreak in the mainland China, Hong Kong and the entire world (data from the website of WHO, Fig.3). This implies that the exponential damping could be a

universal pattern of successful epidemic containment. The damping rate of virus transmission reflects the effectiveness of implemented control measures over the natural infection rate of the disease, and its variation across countries therefore reveals whether or not the current measures are adequate (see Fig.1, Fig.2 & Fig.3). By estimating the time-varying transmission rate and its damping rate, our model provides a simple theoretical framework for monitoring the spread of an epidemic and assessing the extent to which the outbreak has been contained in real time. This is important for regional decision makers to reflect upon so to modify any implemented anti-epidemic measures in time. Our analysis shows that the pandemic is exponentially accelerating at the moment around the world (Fig.2) and an overall damping pattern is yet to emerge. Theoretically, our model can be used for rapid evaluation of the pandemic outbreak in real time and assessment of any intervention measures. To this end, control measures from countries and regions that have already shown exponential damping in their transmission rates, could be communicated and compared by the WHO for better local disease control worldwide.

**Acknowledgement:** FZ is supported by the National Natural Science Foundation of China (No. 31360104) and AHU (No. S020118002/101); CH is supported by the National Research Foundation of South Africa (grant 89967).

## References

1. WHO, "Novel Coronavirus – China," (2020).  
[www.who.int/csr/don/12-january-2020-novel-coronavirus-china/en/](http://www.who.int/csr/don/12-january-2020-novel-coronavirus-china/en/).
2. P. Zhou *et al.*, A pneumonia outbreak associated with a new coronavirus of probable bat origin. *Nature* **579**, 270-273 (2020). 10.1038/s41586-020-2012-7.
3. Q. Li *et al.*, Early Transmission Dynamics in Wuhan, China, of Novel Coronavirus-Infected Pneumonia. *N Engl J Med*, (2020). 10.1056/NEJMoa2001316.
4. M. Chinazzi *et al.*, The effect of travel restrictions on the spread of the 2019 novel coronavirus (COVID-19) outbreak. *Science*, (2020). 10.1126/science.aba9757.

5. WHO, "Report of the WHO-China joint mission on coronavirus disease 2019 (COVID-19)." (2020).  
[www.who.int/docs/default-source/coronaviruse/who-china-joint-mission-on-covid-19-final-report.pdf](http://www.who.int/docs/default-source/coronaviruse/who-china-joint-mission-on-covid-19-final-report.pdf).
6. WHO, "Coronavirus disease 2019 (COVID-19) Situation Report-52," (2020).  
[www.who.int/emergencies/diseases/novel-coronavirus-2019/situation-reports](http://www.who.int/emergencies/diseases/novel-coronavirus-2019/situation-reports).
7. M. J. Keeling, P. Rohani, *Modeling Infectious Diseases*. (Princeton University Press, Princeton and Oxford, 2008).

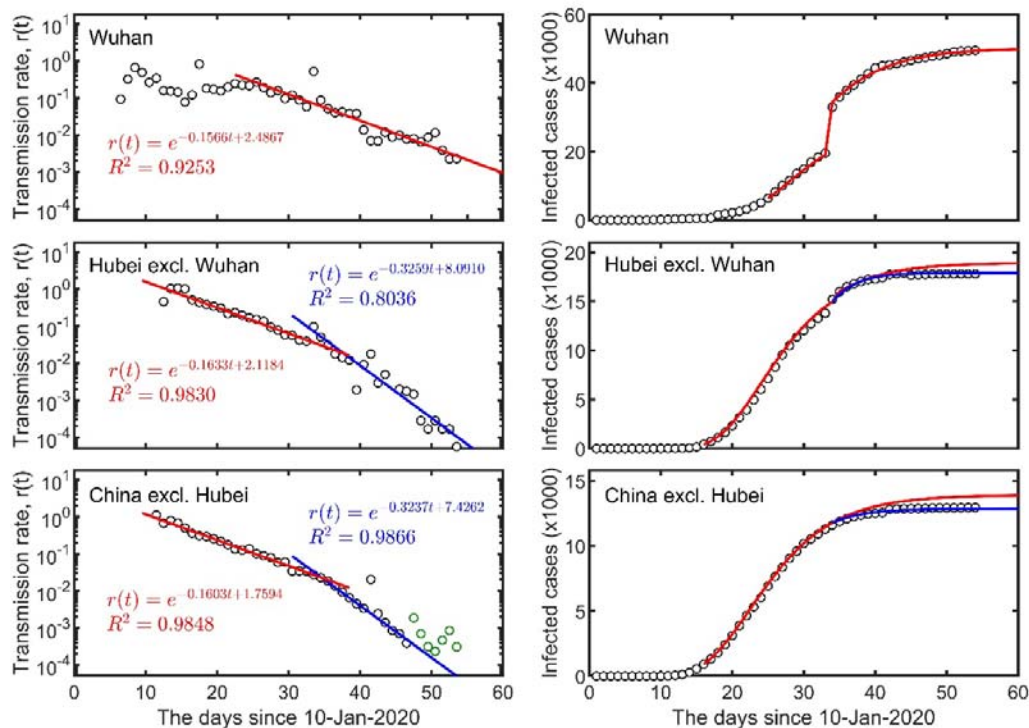

**Fig.1:** The exponential damping of COVID-19 transmission rates in Wuhan city, Hubei Province (excluding Wuhan) and the rest of China (excluding Hubei) (left column), and the total number of infection cases (right column). The red lines on the left panel represent regressions of the data after 3-Feb-2020 for Wuhan city, from 25-Jan-2020 to 11-Feb-2020 for Hubei province (excluding Wuhan) and the rest of China (excluding Hubei), while blue lines are from regressions based on the data after 12-Feb-2020. The lines on the right panels are the corresponding predictions using the fitted time-dependent transmission rate ( $r(t)$ ). Circles indicate real data, where green circles indicate cases imported from other countries and were not considered in the regression.



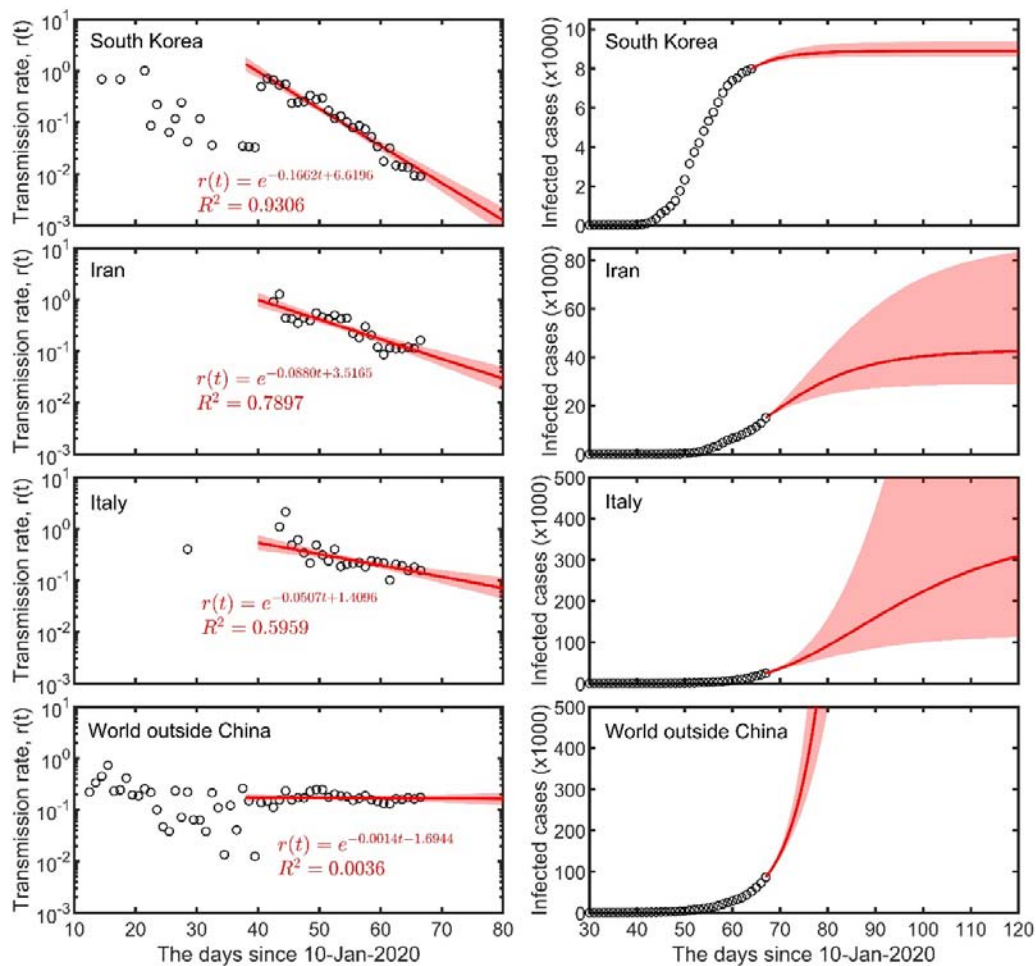

**Fig.2:** The transmission and spread of COVID-19 outside of China based on reported cases. Red lines on the left panel represent regressions of the data from 18-Feb-2020 for South Korea, from 20-Feb-2020 for Iran, from 2-Mar-2020 for Italy, and from 18-Feb-2020 for the entire world outside China, to 16-Mar-2020. Red lines on the right panel are predictions based on the corresponding regressions on the left panel. Shadows indicate 95% confidence intervals.

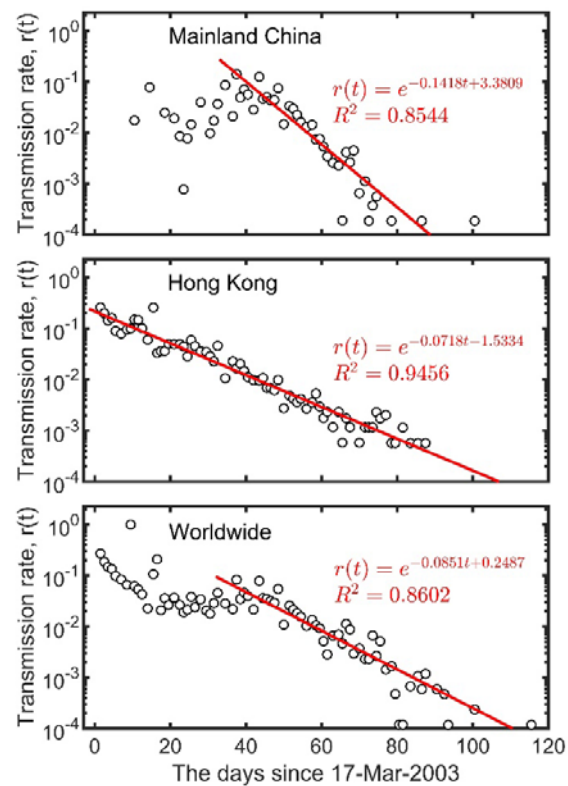

**Fig.3:** The exponential damping of the 2003 SARS transmission rate in China. Data from the website of WHO ([www.who.int](http://www.who.int)).
